# Supplementary material for: Real-world pharmacovigilance analysis of galsulfase: a study based on the FDA adverse event reporting system (FAERS) database
Source: Front Pharmacol. 2024 Aug 5;15:1420126. doi: 10.3389/fphar.2024.1420126 (PMC11330839; doi:10.3389/fphar.2024.1420126)
Supplement: Supplementary file 1 [file Table2.XLSX]

## Sheet: All PT
SOC	PT	n	ROR(95%Cl)	PRR(χ2)	EBGM(EBGM05)	IC(IC025)
CARDIAC DISORDERS	TACHYCARDIA	46	3.96 ( 2.96 - 5.29 )	3.94 ( 101.04 )	3.94 ( 3.09 )	1.98 ( 0.31 )
	CARDIO-RESPIRATORY ARREST	36	6.39 ( 4.6 - 8.86 )	6.36 ( 162.67 )	6.36 ( 4.83 )	2.67 ( 1 )
	MITRAL VALVE INCOMPETENCE	31	20.81 ( 14.62 - 29.63 )	20.74 ( 580.52 )	20.67 ( 15.38 )	4.37 ( 2.7 )
	AORTIC VALVE INCOMPETENCE	17	30.48 ( 18.92 - 49.12 )	30.42 ( 481.43 )	30.28 ( 20.31 )	4.92 ( 3.25 )
	CARDIAC VALVE DISEASE	15	19.34 ( 11.65 - 32.13 )	19.31 ( 259.66 )	19.25 ( 12.59 )	4.27 ( 2.6 )
	CARDIOMEGALY	13	7.59 ( 4.41 - 13.09 )	7.58 ( 74.24 )	7.58 ( 4.8 )	2.92 ( 1.26 )
	MITRAL VALVE DISEASE	12	50.08 ( 28.36 - 88.42 )	50.01 ( 571.78 )	49.62 ( 30.84 )	5.63 ( 3.96 )
	TRICUSPID VALVE INCOMPETENCE	8	8.06 ( 4.03 - 16.12 )	8.05 ( 49.32 )	8.04 ( 4.5 )	3.01 ( 1.34 )
	CARDIOPULMONARY FAILURE	6	11.1 ( 4.98 - 24.73 )	11.09 ( 55 )	11.07 ( 5.66 )	3.47 ( 1.8 )
	MITRAL VALVE STENOSIS	5	54.8 ( 22.71 - 132.19 )	54.76 ( 261.63 )	54.3 ( 25.99 )	5.76 ( 4.09 )
	AORTIC VALVE DISEASE	4	18.53 ( 6.94 - 49.47 )	18.53 ( 66.13 )	18.47 ( 8.13 )	4.21 ( 2.54 )
	MITRAL VALVE PROLAPSE	4	17.36 ( 6.5 - 46.32 )	17.35 ( 61.46 )	17.3 ( 7.61 )	4.11 ( 2.45 )
	AORTIC VALVE STENOSIS	3	12.31 ( 3.96 - 38.22 )	12.31 ( 31.1 )	12.28 ( 4.76 )	3.62 ( 1.95 )
	DIASTOLIC DYSFUNCTION	3	7.33 ( 2.36 - 22.73 )	7.32 ( 16.36 )	7.32 ( 2.84 )	2.87 ( 1.2 )
CONGENITAL, FAMILIAL AND GENETIC DISORDERS	DEVELOPMENTAL HIP DYSPLASIA	13	87.21 ( 50.43 - 150.82 )	87.07 ( 1090.96 )	85.89 ( 54.31 )	6.42 ( 4.76 )
	FORAMEN MAGNUM STENOSIS	8	1288.61 ( 602.02 - 2758.25 )	1287.35 ( 8532.52 )	1068.39 ( 565.17 )	10.06 ( 8.34 )
	MUCOPOLYSACCHARIDOSIS VI	7	43968.37 ( 5408.81 - 357419.82 )	43930.67 ( 38437.59 )	5492.21 ( 951.23 )	12.42 ( 10.5 )
	ENCEPHALOCELE	5	158.58 ( 65.26 - 385.31 )	158.48 ( 763.16 )	154.6 ( 73.55 )	7.27 ( 5.59 )
	PHIMOSIS	4	43.83 ( 16.39 - 117.21 )	43.81 ( 166.17 )	43.51 ( 19.11 )	5.44 ( 3.77 )
	ALPHA-1 ANTITRYPSIN DEFICIENCY	3	156.95 ( 49.9 - 493.64 )	156.9 ( 453.37 )	153.09 ( 58.69 )	7.26 ( 5.57 )
	CONGENITAL MUSCULOSKELETAL DISORDER OF SKULL	3	29.75 ( 9.57 - 92.52 )	29.74 ( 82.94 )	29.61 ( 11.46 )	4.89 ( 3.22 )
EAR AND LABYRINTH DISORDERS	DEAFNESS	19	5.59 ( 3.56 - 8.77 )	5.58 ( 71.38 )	5.58 ( 3.82 )	2.48 ( 0.81 )
	CONDUCTIVE DEAFNESS	8	186.82 ( 92.45 - 377.55 )	186.64 ( 1434.52 )	181.28 ( 100.62 )	7.5 ( 5.83 )
	MIDDLE EAR EFFUSION	7	24.14 ( 11.49 - 50.73 )	24.12 ( 154.57 )	24.04 ( 12.91 )	4.59 ( 2.92 )
	OTORRHOEA	5	21.19 ( 8.8 - 50.99 )	21.17 ( 95.78 )	21.11 ( 10.12 )	4.4 ( 2.73 )
	DEAFNESS BILATERAL	5	23.12 ( 9.61 - 55.65 )	23.11 ( 105.37 )	23.03 ( 11.04 )	4.53 ( 2.86 )
EYE DISORDERS	CORNEAL OPACITY	31	188.14 ( 131.54 - 269.1 )	187.43 ( 5581.85 )	182.02 ( 134.92 )	7.51 ( 5.84 )
	BLINDNESS	22	4.16 ( 2.74 - 6.33 )	4.15 ( 52.7 )	4.15 ( 2.93 )	2.05 ( 0.39 )
	GLAUCOMA	9	3.48 ( 1.81 - 6.69 )	3.48 ( 15.88 )	3.48 ( 2.01 )	1.8 ( 0.13 )
GASTROINTESTINAL DISORDERS	UMBILICAL HERNIA	28	44.82 ( 30.88 - 65.04 )	44.67 ( 1186.97 )	44.36 ( 32.48 )	5.47 ( 3.8 )
	INGUINAL HERNIA	25	29.96 ( 20.21 - 44.4 )	29.87 ( 694.3 )	29.73 ( 21.39 )	4.89 ( 3.23 )
	VOMITING PROJECTILE	4	11.79 ( 4.42 - 31.45 )	11.79 ( 39.41 )	11.77 ( 5.18 )	3.56 ( 1.89 )
GENERAL DISORDERS AND ADMINISTRATION SITE CONDITIONS	PYREXIA	332	7.44 ( 6.67 - 8.31 )	7.18 ( 1774.67 )	7.17 ( 6.54 )	2.84 ( 1.18 )
	SECRETION DISCHARGE	24	15.72 ( 10.53 - 23.48 )	15.68 ( 329.08 )	15.64 ( 11.18 )	3.97 ( 2.3 )
	CATHETER SITE PAIN	16	51.25 ( 31.32 - 83.87 )	51.15 ( 780.43 )	50.75 ( 33.61 )	5.67 ( 4 )
	COMPLICATION ASSOCIATED WITH DEVICE	15	4.24 ( 2.56 - 7.04 )	4.24 ( 37.1 )	4.24 ( 2.77 )	2.08 ( 0.42 )
	HERNIA	14	5.57 ( 3.3 - 9.41 )	5.56 ( 52.35 )	5.56 ( 3.58 )	2.47 ( 0.81 )
	CATHETER SITE SWELLING	12	104.46 ( 59.02 - 184.88 )	104.31 ( 1207.74 )	102.62 ( 63.65 )	6.68 ( 5.01 )
	INFUSION SITE EXTRAVASATION	8	8.92 ( 4.46 - 17.85 )	8.91 ( 56.13 )	8.9 ( 4.98 )	3.15 ( 1.49 )
	CATHETER SITE ERYTHEMA	8	29.68 ( 14.82 - 59.47 )	29.66 ( 220.48 )	29.52 ( 16.5 )	4.88 ( 3.22 )
	EXTRAVASATION	7	12.56 ( 5.98 - 26.38 )	12.55 ( 74.28 )	12.53 ( 6.73 )	3.65 ( 1.98 )
	HYPERTHERMIA	5	4.95 ( 2.06 - 11.91 )	4.95 ( 15.76 )	4.95 ( 2.38 )	2.31 ( 0.64 )
	CATHETER SITE INFLAMMATION	4	53.55 ( 20.01 - 143.31 )	53.53 ( 204.43 )	53.08 ( 23.29 )	5.73 ( 4.06 )
	CATHETER SITE EXTRAVASATION	4	71.55 ( 26.7 - 191.76 )	71.52 ( 275 )	70.72 ( 31 )	6.14 ( 4.47 )
	CATHETER SITE BRUISE	4	142.7 ( 52.96 - 384.55 )	142.63 ( 550.06 )	139.48 ( 60.85 )	7.12 ( 5.44 )
	HERNIA PAIN	3	49.3 ( 15.83 - 153.59 )	49.29 ( 140.82 )	48.91 ( 18.9 )	5.61 ( 3.94 )
	LOSS OF CONTROL OF LEGS	3	5.31 ( 1.71 - 16.48 )	5.31 ( 10.49 )	5.31 ( 2.06 )	2.41 ( 0.74 )
	ADHESION	3	14.16 ( 4.56 - 43.97 )	14.16 ( 36.6 )	14.13 ( 5.47 )	3.82 ( 2.15 )
	GRANULOMA	3	6.7 ( 2.16 - 20.78 )	6.69 ( 14.51 )	6.69 ( 2.59 )	2.74 ( 1.07 )
HEPATOBILIARY DISORDERS	HEPATOSPLENOMEGALY	4	11.8 ( 4.42 - 31.47 )	11.79 ( 39.43 )	11.77 ( 5.18 )	3.56 ( 1.89 )
INFECTIONS AND INFESTATIONS	PNEUMONIA	273	6.22 ( 5.51 - 7.01 )	6.04 ( 1153.94 )	6.04 ( 5.46 )	2.59 ( 0.93 )
	INFLUENZA	75	5.44 ( 4.33 - 6.83 )	5.4 ( 269 )	5.39 ( 4.46 )	2.43 ( 0.77 )
	EAR INFECTION	56	16.69 ( 12.83 - 21.71 )	16.58 ( 817.95 )	16.54 ( 13.27 )	4.05 ( 2.38 )
	DEVICE RELATED INFECTION	43	18.59 ( 13.77 - 25.1 )	18.5 ( 709.83 )	18.45 ( 14.35 )	4.21 ( 2.54 )
	UPPER RESPIRATORY TRACT INFECTION	41	6.76 ( 4.97 - 9.19 )	6.73 ( 199.88 )	6.72 ( 5.2 )	2.75 ( 1.08 )
	VIRAL INFECTION	30	7.15 ( 5 - 10.24 )	7.13 ( 158.01 )	7.12 ( 5.28 )	2.83 ( 1.17 )
	RESPIRATORY TRACT INFECTION	29	8.86 ( 6.15 - 12.76 )	8.83 ( 201.14 )	8.82 ( 6.5 )	3.14 ( 1.47 )
	LOWER RESPIRATORY TRACT INFECTION	18	3.26 ( 2.05 - 5.18 )	3.25 ( 28.12 )	3.25 ( 2.21 )	1.7 ( 0.04 )
	OTITIS MEDIA	13	29.08 ( 16.86 - 50.16 )	29.03 ( 350.29 )	28.9 ( 18.32 )	4.85 ( 3.19 )
	PHARYNGITIS STREPTOCOCCAL	12	8.57 ( 4.86 - 15.09 )	8.55 ( 79.96 )	8.54 ( 5.32 )	3.09 ( 1.43 )
	GASTROENTERITIS VIRAL	10	4.31 ( 2.32 - 8.02 )	4.31 ( 25.37 )	4.3 ( 2.56 )	2.11 ( 0.44 )
	VARICELLA	8	25.65 ( 12.81 - 51.39 )	25.63 ( 188.58 )	25.53 ( 14.27 )	4.67 ( 3.01 )
	TONSILLITIS	7	9.85 ( 4.69 - 20.68 )	9.84 ( 55.53 )	9.83 ( 5.28 )	3.3 ( 1.63 )
	RHINITIS	7	6.63 ( 3.16 - 13.93 )	6.63 ( 33.43 )	6.62 ( 3.56 )	2.73 ( 1.06 )
	PHARYNGITIS	7	4.08 ( 1.94 - 8.56 )	4.08 ( 16.25 )	4.08 ( 2.19 )	2.03 ( 0.36 )
	BACTERAEMIA	7	4.71 ( 2.24 - 9.89 )	4.71 ( 20.43 )	4.7 ( 2.53 )	2.23 ( 0.57 )
	VIRAL UPPER RESPIRATORY TRACT INFECTION	6	8.68 ( 3.9 - 19.34 )	8.68 ( 40.7 )	8.67 ( 4.43 )	3.12 ( 1.45 )
	GASTROINTESTINAL INFECTION	6	5.15 ( 2.31 - 11.47 )	5.15 ( 20.04 )	5.14 ( 2.63 )	2.36 ( 0.7 )
	PNEUMONIA BACTERIAL	6	5.44 ( 2.44 - 12.12 )	5.44 ( 21.73 )	5.44 ( 2.78 )	2.44 ( 0.78 )
	TRACHEOSTOMY INFECTION	5	330.51 ( 134.43 - 812.57 )	330.31 ( 1559.47 )	313.84 ( 147.85 )	8.29 ( 6.6 )
	DENGUE FEVER	5	18.6 ( 7.73 - 44.76 )	18.59 ( 82.97 )	18.54 ( 8.89 )	4.21 ( 2.54 )
	POSTOPERATIVE WOUND INFECTION	5	4.75 ( 1.97 - 11.41 )	4.75 ( 14.77 )	4.74 ( 2.28 )	2.25 ( 0.58 )
	ATYPICAL PNEUMONIA	4	8.78 ( 3.29 - 23.42 )	8.78 ( 27.53 )	8.77 ( 3.86 )	3.13 ( 1.46 )
	STAPHYLOCOCCAL BACTERAEMIA	4	7.54 ( 2.83 - 20.11 )	7.54 ( 22.66 )	7.53 ( 3.31 )	2.91 ( 1.25 )
	OTITIS MEDIA ACUTE	3	29.85 ( 9.6 - 92.82 )	29.84 ( 83.22 )	29.7 ( 11.49 )	4.89 ( 3.22 )
	SERRATIA INFECTION	3	32.47 ( 10.44 - 101 )	32.46 ( 91.01 )	32.3 ( 12.5 )	5.01 ( 3.34 )
	H1N1 INFLUENZA	3	15 ( 4.83 - 46.57 )	14.99 ( 39.08 )	14.96 ( 5.8 )	3.9 ( 2.23 )
	RHINOVIRUS INFECTION	3	7.32 ( 2.36 - 22.72 )	7.32 ( 16.35 )	7.31 ( 2.84 )	2.87 ( 1.2 )
INJURY, POISONING AND PROCEDURAL COMPLICATIONS	INFUSION RELATED REACTION	34	4.17 ( 2.98 - 5.84 )	4.16 ( 81.51 )	4.15 ( 3.13 )	2.05 ( 0.39 )
	HEAD INJURY	20	4.82 ( 3.1 - 7.47 )	4.81 ( 60.27 )	4.8 ( 3.33 )	2.26 ( 0.6 )
	TRACHEOSTOMY MALFUNCTION	9	332.61 ( 170.07 - 650.5 )	332.25 ( 2822.83 )	315.59 ( 180.05 )	8.3 ( 6.62 )
	SKIN ABRASION	9	9.19 ( 4.78 - 17.68 )	9.18 ( 65.52 )	9.17 ( 5.3 )	3.2 ( 1.53 )
	SCRATCH	8	6.67 ( 3.33 - 13.34 )	6.66 ( 38.47 )	6.66 ( 3.73 )	2.73 ( 1.07 )
	ENDOTRACHEAL INTUBATION COMPLICATION	6	68.26 ( 30.53 - 152.66 )	68.22 ( 393.11 )	67.49 ( 34.42 )	6.08 ( 4.41 )
	ARTHROPOD BITE	6	6.01 ( 2.7 - 13.38 )	6 ( 25 )	6 ( 3.07 )	2.58 ( 0.92 )
	VASCULAR ACCESS COMPLICATION	5	46.52 ( 19.29 - 112.15 )	46.49 ( 220.91 )	46.15 ( 22.1 )	5.53 ( 3.86 )
	SHUNT OCCLUSION	4	48.3 ( 18.05 - 129.21 )	48.28 ( 183.77 )	47.91 ( 21.03 )	5.58 ( 3.91 )
	SHUNT MALFUNCTION	4	102.93 ( 38.31 - 276.53 )	102.88 ( 397.06 )	101.24 ( 44.28 )	6.66 ( 4.99 )
	WOUND COMPLICATION	4	8.58 ( 3.22 - 22.88 )	8.58 ( 26.74 )	8.57 ( 3.77 )	3.1 ( 1.43 )
	ANIMAL SCRATCH	4	31.24 ( 11.69 - 83.45 )	31.22 ( 116.44 )	31.07 ( 13.66 )	4.96 ( 3.29 )
	TRACHEAL OBSTRUCTION	3	84.46 ( 27.03 - 263.92 )	84.43 ( 244.04 )	83.32 ( 32.11 )	6.38 ( 4.7 )
INVESTIGATIONS	OXYGEN SATURATION DECREASED	100	14.5 ( 11.9 - 17.67 )	14.34 ( 1238.73 )	14.3 ( 12.13 )	3.84 ( 2.17 )
	BODY TEMPERATURE INCREASED	17	6.14 ( 3.81 - 9.88 )	6.13 ( 72.88 )	6.12 ( 4.11 )	2.61 ( 0.95 )
	SARS-COV-2 TEST POSITIVE	10	5.28 ( 2.84 - 9.81 )	5.27 ( 34.58 )	5.27 ( 3.13 )	2.4 ( 0.73 )
	RESPIRATORY RATE INCREASED	9	7.97 ( 4.14 - 15.32 )	7.96 ( 54.7 )	7.95 ( 4.6 )	2.99 ( 1.32 )
	INTRAOCULAR PRESSURE INCREASED	7	3.98 ( 1.9 - 8.36 )	3.98 ( 15.61 )	3.98 ( 2.14 )	1.99 ( 0.33 )
	OXYGEN SATURATION ABNORMAL	5	14.91 ( 6.2 - 35.87 )	14.9 ( 64.68 )	14.87 ( 7.13 )	3.89 ( 2.23 )
	INTERNATIONAL NORMALISED RATIO ABNORMAL	3	6.11 ( 1.97 - 18.96 )	6.11 ( 12.81 )	6.1 ( 2.37 )	2.61 ( 0.94 )
	BLOOD CULTURE POSITIVE	3	7.22 ( 2.33 - 22.41 )	7.22 ( 16.06 )	7.21 ( 2.8 )	2.85 ( 1.18 )
	MAGNETIC RESONANCE IMAGING HEAD ABNORMAL	3	9.94 ( 3.2 - 30.87 )	9.94 ( 24.09 )	9.93 ( 3.85 )	3.31 ( 1.64 )
METABOLISM AND NUTRITION DISORDERS	WEIGHT GAIN POOR	3	10.38 ( 3.34 - 32.21 )	10.37 ( 25.37 )	10.36 ( 4.01 )	3.37 ( 1.71 )
	FOOD INTOLERANCE	3	6.24 ( 2.01 - 19.35 )	6.23 ( 13.17 )	6.23 ( 2.42 )	2.64 ( 0.97 )
MUSCULOSKELETAL AND CONNECTIVE TISSUE DISORDERS	CERVICAL SPINAL STENOSIS	58	250.75 ( 192.7 - 326.28 )	248.97 ( 13778.42 )	239.51 ( 192.15 )	7.9 ( 6.24 )
	SPINAL STENOSIS	19	15.75 ( 10.04 - 24.72 )	15.72 ( 261.24 )	15.68 ( 10.75 )	3.97 ( 2.3 )
	SCOLIOSIS	16	18.58 ( 11.37 - 30.36 )	18.54 ( 264.8 )	18.49 ( 12.26 )	4.21 ( 2.54 )
	KYPHOSIS	14	56.53 ( 33.38 - 95.71 )	56.43 ( 755.5 )	55.94 ( 36 )	5.81 ( 4.14 )
	SPINAL DISORDER	8	6.21 ( 3.11 - 12.43 )	6.21 ( 34.93 )	6.2 ( 3.47 )	2.63 ( 0.97 )
	SPINAL PAIN	7	4.36 ( 2.08 - 9.16 )	4.36 ( 18.12 )	4.36 ( 2.34 )	2.12 ( 0.46 )
	LUMBAR SPINAL STENOSIS	6	14.59 ( 6.55 - 32.51 )	14.58 ( 75.71 )	14.55 ( 7.44 )	3.86 ( 2.2 )
	SPINAL DEFORMITY	6	25.19 ( 11.29 - 56.17 )	25.17 ( 138.71 )	25.07 ( 12.82 )	4.65 ( 2.98 )
	KNEE DEFORMITY	5	24.47 ( 10.17 - 58.91 )	24.46 ( 112.06 )	24.37 ( 11.68 )	4.61 ( 2.94 )
	ATLANTOAXIAL INSTABILITY	5	360.9 ( 146.49 - 889.12 )	360.68 ( 1695.94 )	341.13 ( 160.43 )	8.41 ( 6.72 )
	LIMB DEFORMITY	3	12.4 ( 3.99 - 38.5 )	12.39 ( 31.36 )	12.37 ( 4.79 )	3.63 ( 1.96 )
NERVOUS SYSTEM DISORDERS	SPINAL CORD COMPRESSION	133	265.14 ( 222.61 - 315.79 )	260.84 ( 33054.42 )	250.47 ( 216.38 )	7.97 ( 6.3 )
	SEIZURE	78	3.45 ( 2.76 - 4.32 )	3.43 ( 134.68 )	3.43 ( 2.85 )	1.78 ( 0.11 )
	CERVICAL CORD COMPRESSION	54	1381.17 ( 1028.08 - 1855.53 )	1372.04 ( 60709.97 )	1126.07 ( 879.59 )	10.14 ( 8.46 )
	CARPAL TUNNEL SYNDROME	44	23.28 ( 17.3 - 31.33 )	23.16 ( 929.81 )	23.08 ( 18 )	4.53 ( 2.86 )
	HYDROCEPHALUS	41	57.6 ( 42.32 - 78.4 )	57.32 ( 2248.49 )	56.81 ( 43.89 )	5.83 ( 4.16 )
	INTRACRANIAL PRESSURE INCREASED	19	26.1 ( 16.62 - 40.98 )	26.04 ( 455.65 )	25.94 ( 17.78 )	4.7 ( 3.03 )
	MYELOPATHY	11	37.92 ( 20.95 - 68.62 )	37.87 ( 392.49 )	37.65 ( 22.92 )	5.23 ( 3.57 )
	QUADRIPLEGIA	9	33.72 ( 17.51 - 64.94 )	33.68 ( 283.88 )	33.51 ( 19.36 )	5.07 ( 3.4 )
	MUSCLE SPASTICITY	9	5.02 ( 2.61 - 9.65 )	5.01 ( 28.9 )	5.01 ( 2.9 )	2.32 ( 0.66 )
	HYPERREFLEXIA	8	16.91 ( 8.45 - 33.85 )	16.89 ( 119.3 )	16.85 ( 9.43 )	4.07 ( 2.41 )
	HYPOKINESIA	8	3.99 ( 1.99 - 7.98 )	3.99 ( 17.89 )	3.98 ( 2.23 )	1.99 ( 0.33 )
	MOTOR DYSFUNCTION	6	4.51 ( 2.02 - 10.04 )	4.5 ( 16.35 )	4.5 ( 2.3 )	2.17 ( 0.5 )
	PARAPLEGIA	6	15.37 ( 6.9 - 34.25 )	15.36 ( 80.34 )	15.32 ( 7.84 )	3.94 ( 2.27 )
	EXTENSOR PLANTAR RESPONSE	5	38.91 ( 16.15 - 93.76 )	38.88 ( 183.41 )	38.65 ( 18.52 )	5.27 ( 3.6 )
	PARTIAL SEIZURES	4	5.97 ( 2.24 - 15.91 )	5.97 ( 16.52 )	5.96 ( 2.62 )	2.58 ( 0.91 )
	CLONUS	4	10.85 ( 4.07 - 28.95 )	10.85 ( 35.7 )	10.83 ( 4.77 )	3.44 ( 1.77 )
	CEREBROSPINAL FLUID LEAKAGE	3	12.46 ( 4.01 - 38.67 )	12.45 ( 31.54 )	12.43 ( 4.82 )	3.64 ( 1.97 )
	PYRAMIDAL TRACT SYNDROME	3	53.66 ( 17.22 - 167.22 )	53.64 ( 153.66 )	53.19 ( 20.55 )	5.73 ( 4.06 )
	CEREBRAL VENTRICLE DILATATION	3	19.26 ( 6.2 - 59.83 )	19.25 ( 51.75 )	19.2 ( 7.43 )	4.26 ( 2.59 )
PRODUCT ISSUES	DEVICE OCCLUSION	13	7.9 ( 4.58 - 13.61 )	7.89 ( 78.08 )	7.88 ( 5 )	2.98 ( 1.31 )
PSYCHIATRIC DISORDERS	LISTLESS	3	6.59 ( 2.12 - 20.43 )	6.58 ( 14.19 )	6.58 ( 2.55 )	2.72 ( 1.05 )
RENAL AND URINARY DISORDERS	NEUROGENIC BLADDER	4	13.71 ( 5.14 - 36.57 )	13.7 ( 47 )	13.67 ( 6.02 )	3.77 ( 2.11 )
	GLOMERULONEPHRITIS MEMBRANOUS	4	25.84 ( 9.68 - 69 )	25.83 ( 95.07 )	25.72 ( 11.31 )	4.69 ( 3.02 )
	NEPHRITIC SYNDROME	3	69.76 ( 22.35 - 217.69 )	69.73 ( 201 )	68.98 ( 26.62 )	6.11 ( 4.43 )
RESPIRATORY, THORACIC AND MEDIASTINAL DISORDERS	COUGH	178	4.96 ( 4.28 - 5.76 )	4.88 ( 550.66 )	4.87 ( 4.3 )	2.29 ( 0.62 )
	RESPIRATORY FAILURE	54	5.6 ( 4.28 - 7.32 )	5.57 ( 202.38 )	5.56 ( 4.45 )	2.48 ( 0.81 )
	RHINORRHOEA	54	6.46 ( 4.94 - 8.45 )	6.43 ( 247.41 )	6.42 ( 5.13 )	2.68 ( 1.02 )
	SLEEP APNOEA SYNDROME	49	18.39 ( 13.88 - 24.36 )	18.28 ( 798.42 )	18.23 ( 14.41 )	4.19 ( 2.52 )
	RESPIRATORY DISORDER	47	11.98 ( 8.99 - 15.97 )	11.92 ( 469.52 )	11.9 ( 9.36 )	3.57 ( 1.91 )
	OROPHARYNGEAL PAIN	40	3.21 ( 2.35 - 4.38 )	3.2 ( 60.54 )	3.2 ( 2.47 )	1.68 ( 0.01 )
	RESPIRATORY DISTRESS	38	10.42 ( 7.58 - 14.34 )	10.38 ( 321.61 )	10.36 ( 7.93 )	3.37 ( 1.71 )
	NASAL CONGESTION	37	4.94 ( 3.57 - 6.82 )	4.92 ( 115.55 )	4.92 ( 3.75 )	2.3 ( 0.63 )
	PULMONARY HYPERTENSION	28	9.85 ( 6.79 - 14.27 )	9.82 ( 221.43 )	9.8 ( 7.18 )	3.29 ( 1.63 )
	BRONCHOSPASM	27	14.31 ( 9.8 - 20.88 )	14.26 ( 332.32 )	14.23 ( 10.37 )	3.83 ( 2.16 )
	PRODUCTIVE COUGH	26	4.37 ( 2.98 - 6.43 )	4.36 ( 67.38 )	4.36 ( 3.16 )	2.12 ( 0.46 )
	TACHYPNOEA	23	13.45 ( 8.93 - 20.26 )	13.41 ( 263.72 )	13.39 ( 9.5 )	3.74 ( 2.08 )
	OBSTRUCTIVE AIRWAYS DISORDER	21	14.09 ( 9.18 - 21.64 )	14.06 ( 254.25 )	14.03 ( 9.8 )	3.81 ( 2.14 )
	RESPIRATORY ARREST	15	3.86 ( 2.33 - 6.41 )	3.86 ( 31.73 )	3.85 ( 2.52 )	1.95 ( 0.28 )
	APNOEA	15	14.33 ( 8.63 - 23.79 )	14.3 ( 185.18 )	14.27 ( 9.34 )	3.84 ( 2.17 )
	ACUTE RESPIRATORY FAILURE	14	5.75 ( 3.4 - 9.71 )	5.74 ( 54.78 )	5.74 ( 3.7 )	2.52 ( 0.85 )
	INCREASED BRONCHIAL SECRETION	12	43.95 ( 24.9 - 77.57 )	43.89 ( 499.44 )	43.59 ( 27.1 )	5.45 ( 3.78 )
	PULMONARY CONGESTION	8	4.75 ( 2.37 - 9.51 )	4.75 ( 23.65 )	4.74 ( 2.66 )	2.25 ( 0.58 )
	BRONCHIAL OBSTRUCTION	8	41.12 ( 20.51 - 82.45 )	41.09 ( 310.85 )	40.82 ( 22.81 )	5.35 ( 3.68 )
	ATELECTASIS	7	5.3 ( 2.53 - 11.13 )	5.3 ( 24.39 )	5.29 ( 2.85 )	2.4 ( 0.74 )
	RESPIRATION ABNORMAL	7	8.16 ( 3.89 - 17.13 )	8.15 ( 43.89 )	8.15 ( 4.38 )	3.03 ( 1.36 )
	ASTHMATIC CRISIS	6	10.26 ( 4.6 - 22.85 )	10.25 ( 50 )	10.23 ( 5.24 )	3.36 ( 1.69 )
	TRACHEAL STENOSIS	6	96.62 ( 43.13 - 216.46 )	96.55 ( 558.78 )	95.1 ( 48.43 )	6.57 ( 4.9 )
	ADENOIDAL HYPERTROPHY	6	117.39 ( 52.33 - 263.33 )	117.3 ( 679.19 )	115.17 ( 58.58 )	6.85 ( 5.17 )
	RHONCHI	6	32.48 ( 14.56 - 72.48 )	32.46 ( 182.01 )	32.3 ( 16.5 )	5.01 ( 3.35 )
	OBSTRUCTIVE SLEEP APNOEA SYNDROME	6	51.13 ( 22.89 - 114.21 )	51.09 ( 292.29 )	50.69 ( 25.87 )	5.66 ( 3.99 )
	RESTRICTIVE PULMONARY DISEASE	5	32.77 ( 13.61 - 78.94 )	32.75 ( 153.13 )	32.59 ( 15.62 )	5.03 ( 3.36 )
	SNORING	5	9.94 ( 4.14 - 23.92 )	9.94 ( 40.14 )	9.93 ( 4.76 )	3.31 ( 1.64 )
	TONSILLAR HYPERTROPHY	5	22.56 ( 9.37 - 54.29 )	22.54 ( 102.57 )	22.47 ( 10.77 )	4.49 ( 2.82 )
	ASPHYXIA	5	4.4 ( 1.83 - 10.59 )	4.4 ( 13.14 )	4.4 ( 2.11 )	2.14 ( 0.47 )
	TRACHEOMALACIA	5	102.27 ( 42.26 - 247.54 )	102.21 ( 493.08 )	100.59 ( 48.01 )	6.65 ( 4.98 )
	RALES	5	6.29 ( 2.62 - 15.13 )	6.29 ( 22.22 )	6.28 ( 3.02 )	2.65 ( 0.99 )
	TRACHEAL DISORDER	5	75.3 ( 31.17 - 181.9 )	75.25 ( 361.98 )	74.37 ( 35.55 )	6.22 ( 4.54 )
	UPPER AIRWAY OBSTRUCTION	5	40.46 ( 16.79 - 97.51 )	40.44 ( 191.08 )	40.18 ( 19.25 )	5.33 ( 3.66 )
	RESPIRATORY SYMPTOM	4	13.19 ( 4.94 - 35.19 )	13.18 ( 44.95 )	13.16 ( 5.79 )	3.72 ( 2.05 )
	USE OF ACCESSORY RESPIRATORY MUSCLES	4	67.51 ( 25.2 - 180.88 )	67.48 ( 259.2 )	66.77 ( 29.27 )	6.06 ( 4.39 )
	PHARYNGEAL ERYTHEMA	3	9.72 ( 3.13 - 30.16 )	9.71 ( 23.42 )	9.7 ( 3.76 )	3.28 ( 1.61 )
	RESPIRATORY TRACT OEDEMA	3	33.1 ( 10.64 - 102.96 )	33.09 ( 92.87 )	32.92 ( 12.74 )	5.04 ( 3.37 )
	HYPERCAPNIA	3	7.81 ( 2.52 - 24.25 )	7.81 ( 17.8 )	7.8 ( 3.03 )	2.96 ( 1.3 )
SKIN AND SUBCUTANEOUS TISSUE DISORDERS	SCAB	6	4.05 ( 1.82 - 9.02 )	4.05 ( 13.77 )	4.05 ( 2.07 )	2.02 ( 0.35 )
SOCIAL CIRCUMSTANCES	BEDRIDDEN	8	4.52 ( 2.26 - 9.05 )	4.52 ( 21.93 )	4.52 ( 2.53 )	2.18 ( 0.51 )
	WALKING DISABILITY	6	20.39 ( 9.15 - 45.46 )	20.38 ( 110.2 )	20.31 ( 10.39 )	4.34 ( 2.68 )
SURGICAL AND MEDICAL PROCEDURES	TRACHEOSTOMY	26	143.21 ( 97.03 - 211.38 )	142.76 ( 3578.54 )	139.6 ( 100.79 )	7.13 ( 5.46 )
	CORNEAL TRANSPLANT	19	207.86 ( 131.54 - 328.45 )	207.37 ( 3777.43 )	200.77 ( 136.91 )	7.65 ( 5.98 )
	HIP SURGERY	16	25.12 ( 15.37 - 41.06 )	25.07 ( 368.35 )	24.98 ( 16.56 )	4.64 ( 2.98 )
	SPINAL OPERATION	15	10.81 ( 6.51 - 17.95 )	10.79 ( 133.06 )	10.78 ( 7.05 )	3.43 ( 1.76 )
	EAR TUBE INSERTION	13	359.98 ( 205.75 - 629.81 )	359.41 ( 4394.68 )	339.99 ( 212.91 )	8.41 ( 6.73 )
	SPINAL DECOMPRESSION	13	253.77 ( 145.7 - 442.01 )	253.37 ( 3141.08 )	243.58 ( 153.11 )	7.93 ( 6.25 )
	KNEE OPERATION	12	10.28 ( 5.83 - 18.11 )	10.26 ( 100.16 )	10.25 ( 6.38 )	3.36 ( 1.69 )
	BONE MARROW TRANSPLANT	10	42.4 ( 22.76 - 78.99 )	42.35 ( 401.01 )	42.07 ( 24.99 )	5.39 ( 3.73 )
	ADENOIDECTOMY	8	175.11 ( 86.7 - 353.64 )	174.94 ( 1346.02 )	170.22 ( 94.53 )	7.41 ( 5.74 )
	TONSILLECTOMY	7	31.61 ( 15.04 - 66.45 )	31.58 ( 206.26 )	31.43 ( 16.88 )	4.97 ( 3.31 )
	CENTRAL VENOUS CATHETERISATION	7	17.15 ( 8.17 - 36.03 )	17.14 ( 106.11 )	17.1 ( 9.19 )	4.1 ( 2.43 )
	UMBILICAL HERNIA REPAIR	6	162.42 ( 72.2 - 365.38 )	162.31 ( 937.63 )	158.24 ( 80.3 )	7.31 ( 5.63 )
	ADENOTONSILLECTOMY	6	182.92 ( 81.21 - 412.03 )	182.79 ( 1054.08 )	177.65 ( 90.05 )	7.47 ( 5.79 )
	CARPAL TUNNEL DECOMPRESSION	6	43.87 ( 19.65 - 97.95 )	43.84 ( 249.41 )	43.54 ( 22.23 )	5.44 ( 3.78 )
	HERNIA REPAIR	6	17.49 ( 7.85 - 38.99 )	17.48 ( 92.98 )	17.44 ( 8.92 )	4.12 ( 2.46 )
	SPINAL LAMINECTOMY	5	37.83 ( 15.7 - 91.15 )	37.81 ( 178.09 )	37.59 ( 18.01 )	5.23 ( 3.56 )
	NECK SURGERY	5	18.36 ( 7.63 - 44.18 )	18.35 ( 81.79 )	18.3 ( 8.78 )	4.19 ( 2.53 )
	CATHETER MANAGEMENT	4	28.8 ( 10.78 - 76.93 )	28.79 ( 106.8 )	28.66 ( 12.6 )	4.84 ( 3.17 )
	OTORHINOLARYNGOLOGICAL SURGERY	4	643.99 ( 230.08 - 1802.52 )	643.67 ( 2327.94 )	583.89 ( 246.78 )	9.19 ( 7.47 )
	CORNEAL OPERATION	3	285.37 ( 89.71 - 907.8 )	285.26 ( 812.86 )	272.9 ( 103.63 )	8.09 ( 6.39 )
	HEART VALVE REPLACEMENT	3	15.84 ( 5.1 - 49.19 )	15.83 ( 41.59 )	15.8 ( 6.12 )	3.98 ( 2.31 )
	VENTRICULO-PERITONEAL SHUNT	3	235.43 ( 74.33 - 745.64 )	235.34 ( 674.74 )	226.87 ( 86.47 )	7.83 ( 6.13 )
	GASTROSTOMY	3	14.11 ( 4.54 - 43.81 )	14.1 ( 36.44 )	14.07 ( 5.45 )	3.81 ( 2.15 )
	EAR OPERATION	3	67.99 ( 21.79 - 212.16 )	67.97 ( 195.83 )	67.25 ( 25.95 )	6.07 ( 4.4 )
	OSTEOTOMY	3	69.5 ( 22.27 - 216.89 )	69.47 ( 200.25 )	68.72 ( 26.52 )	6.1 ( 4.43 )
	NEUROSURGERY	3	114.84 ( 36.65 - 359.85 )	114.8 ( 332.35 )	112.76 ( 43.36 )	6.82 ( 5.14 )
	CATHETER PLACEMENT	3	11.63 ( 3.75 - 36.11 )	11.63 ( 29.09 )	11.61 ( 4.5 )	3.54 ( 1.87 )
VASCULAR DISORDERS	CYANOSIS	47	22.95 ( 17.22 - 30.59 )	22.82 ( 977.51 )	22.75 ( 17.89 )	4.51 ( 2.84 )
	POOR VENOUS ACCESS	23	17.27 ( 11.46 - 26.02 )	17.22 ( 350.55 )	17.18 ( 12.19 )	4.1 ( 2.44 )
	PALLOR	19	5.16 ( 3.29 - 8.1 )	5.15 ( 63.55 )	5.15 ( 3.53 )	2.36 ( 0.7 )
